# Supplementary material for: Coordination-driven assembly of a 3d–4f heterometallic organic framework with 1D Cu4I4 and Eu-based chains: syntheses, structures and various properties
Source: Royal Society of Chemistry journal article supplement (doi:10.1039/d0dt01811b), 2020-01-01
Supplement: d0dt01811b1.pdf [file d0dt01811b1.pdf]

***Electronic Supplementary Information***

**Coordination-driven assembly of a 3d-4f heterometallic organic framework based on 1D Cu<sub>4</sub>I<sub>4</sub> and Eu-based chains: Syntheses, structures and various properties**

Feng Guo,<sup>[a]\*</sup> Changhua Su,<sup>[b]</sup> Yuhang Fan,<sup>[a]</sup> Wenbing Shi<sup>[a]</sup>, and Xiuling Zhang<sup>[c]</sup>

<sup>a</sup> *Chongqing Key Laboratory of Inorganic Special Functional Materials, College of Chemistry and Chemical Engineering, Yangtze Normal University, Fuling, Chongqing 408100, P. R. China.*

*E-mail: guofeng1510@yeah.net.*

<sup>b</sup> *School of Materials Science and Engineering, Liaocheng University, Liaocheng, Shandong, 252059, P. R. China.*

<sup>c</sup> *College of Chemistry and Chemical Engineering, Dezhou University, Dezhou, 253023, P. R. China.*

***Dalton Transactions***

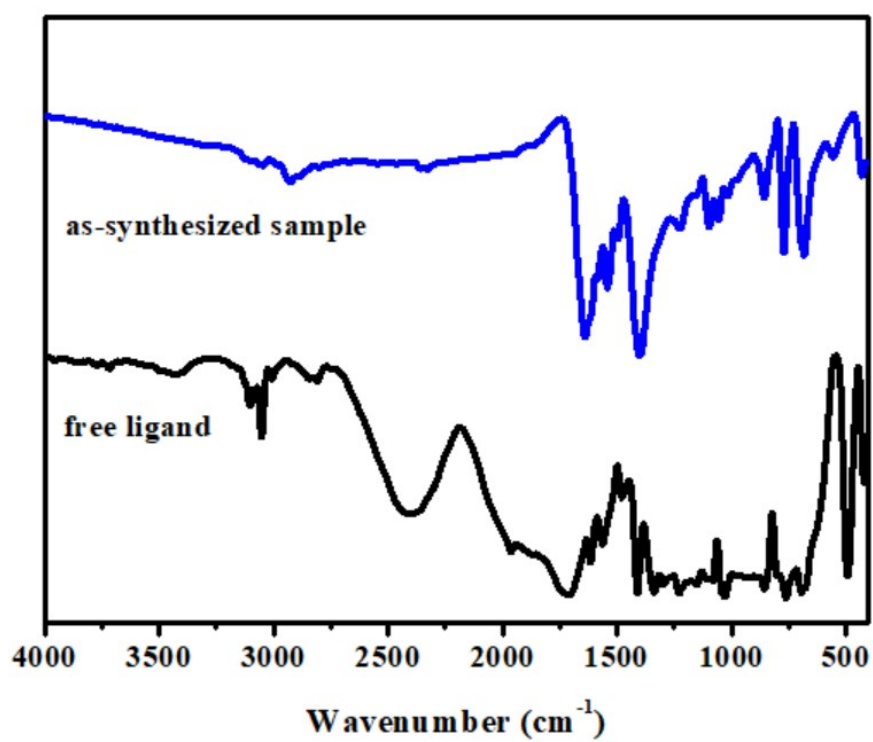

**Figure S1.** FT-IR spectra of free HINA ligand and as-synthesized samples.

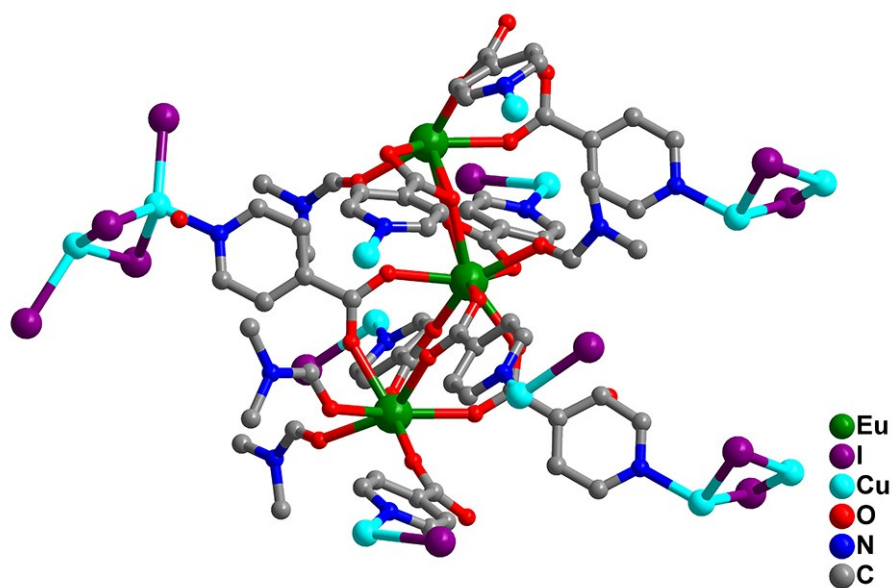

**Figure S2.** The asymmetrical unit.

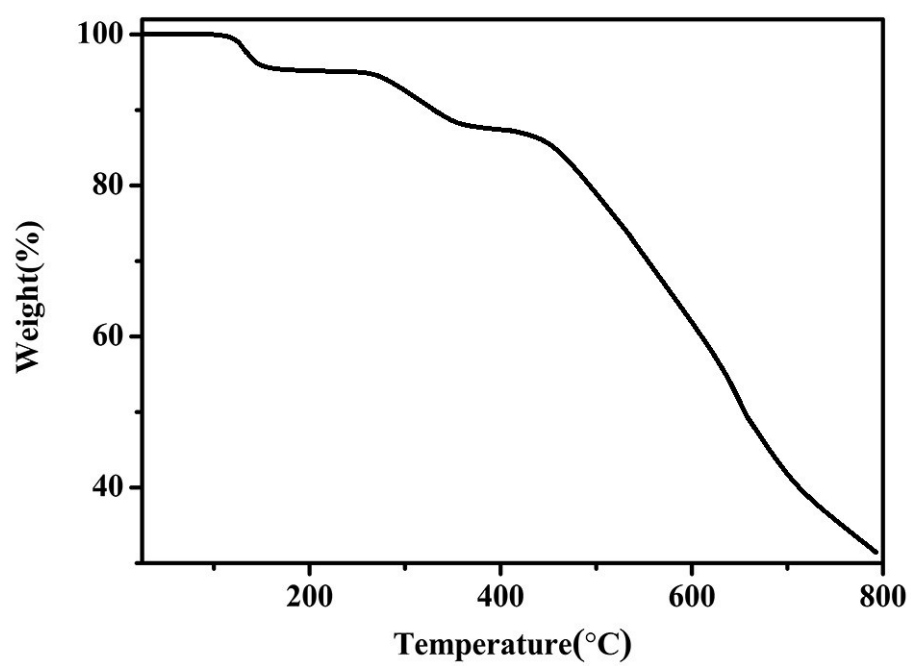

**Figure S3.** The TGA curve of as-synthesized samples.

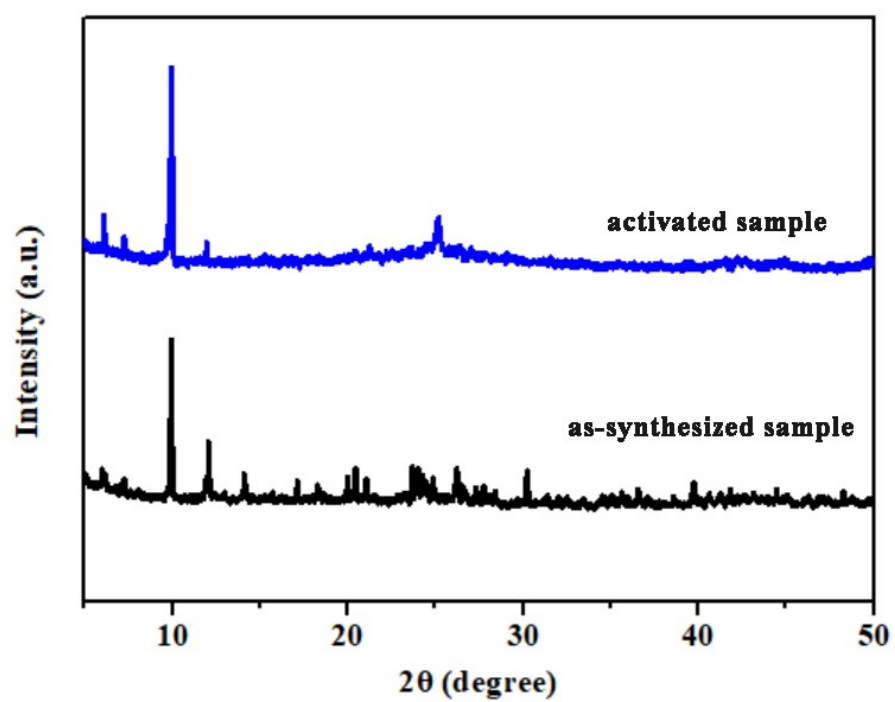

**Figure S4.** The PXRD patterns of as-synthesized and activated samples.

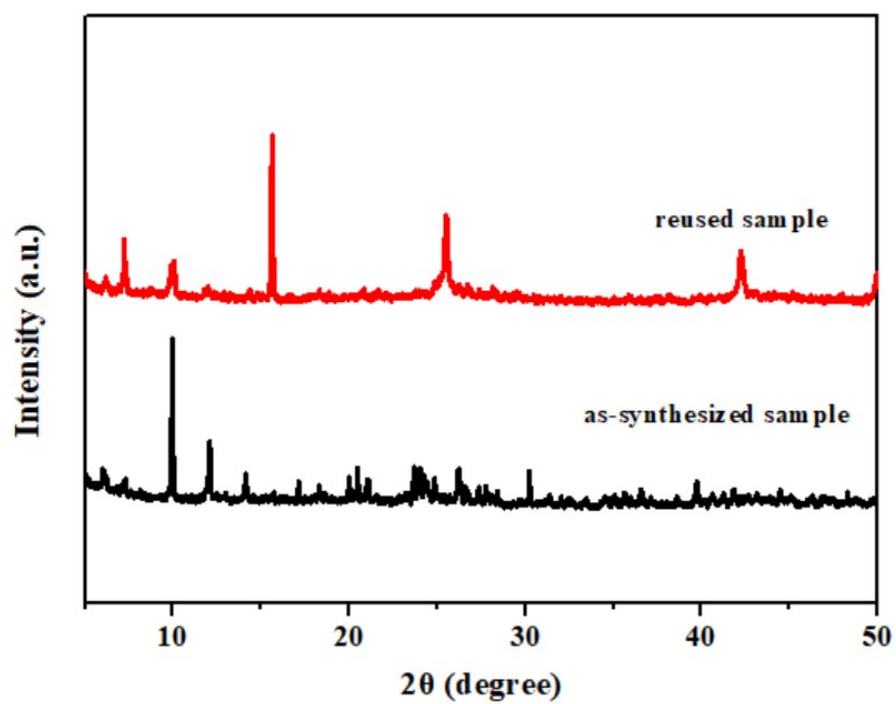

**Figure S5.** The PXRD patterns of as-synthesized and reused samples.

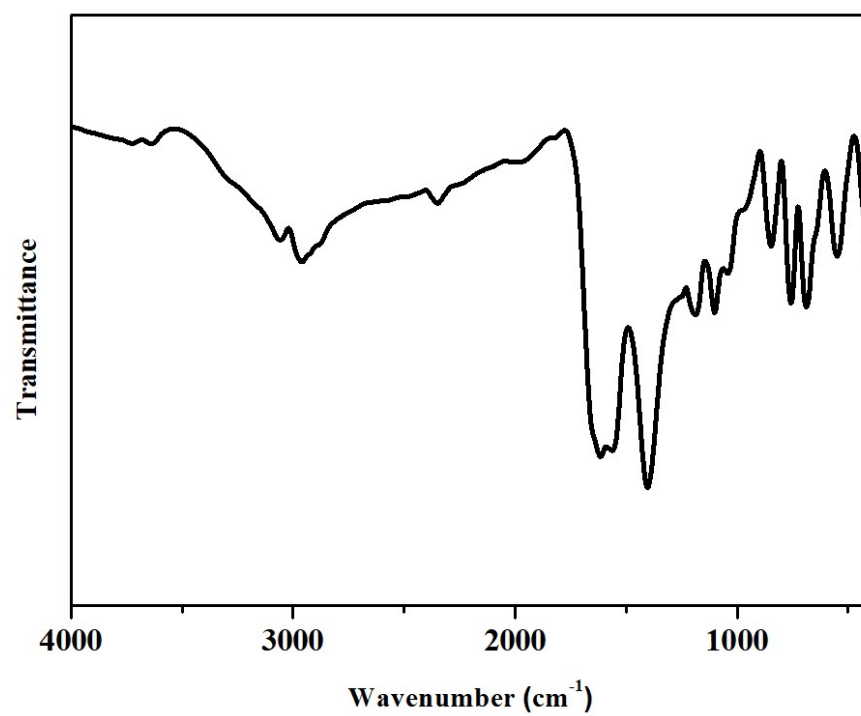

**Figure S6.** The FT-IR spectrum of reused samples.
